# Supplementary material for: pH-dependent syntheses, luminescence and magnetic properties of two-dimensional framework lanthanide 1,3-diarylphosphonate complexes
Source: Royal Society of Chemistry journal article supplement (doi:10.1039/c3nj01388j), 2014-01-01
Supplement: c3nj01388j.pdf [file c3nj01388j.pdf]

# New Journal of Chemistry

## Supporting Information

### pH-Dependent Syntheses, Luminescence and Magnetic Properties of Two-Dimensional Framework Lanthanide 1,3-Diarylphosphonate Complexes

Yi-Fu Liu,<sup>†</sup> Guang-Feng Hou,<sup>†,‡</sup> Ying-Hui Yu,<sup>†</sup> Peng-Fei Yan,<sup>\*,†</sup> Guang-Ming Li<sup>†</sup>  
and Jin-Sheng Gao<sup>\*,†,‡</sup>

<sup>†</sup>Key Laboratory of Functional Inorganic Material Chemistry of Education Ministry, School of Chemistry and Materials Science, Heilongjiang University, Harbin 150080, P. R. of China

<sup>‡</sup>Engineering Research Center of Pesticide of Heilongjiang University, Harbin 150080, P. R. China

\*To whom correspondence should be addressed. Tel: +86-451-86609001. E-mail: [gaojins@hlju.edu.cn](mailto:gaojins@hlju.edu.cn); [lyf\\_170@sina.com](mailto:lyf_170@sina.com).

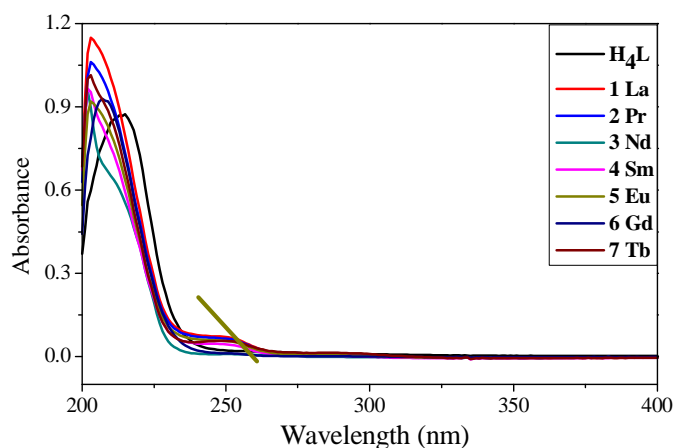

**Fig. S1** The UV spectra of ligand H<sub>4</sub>L and complexes 1–7.

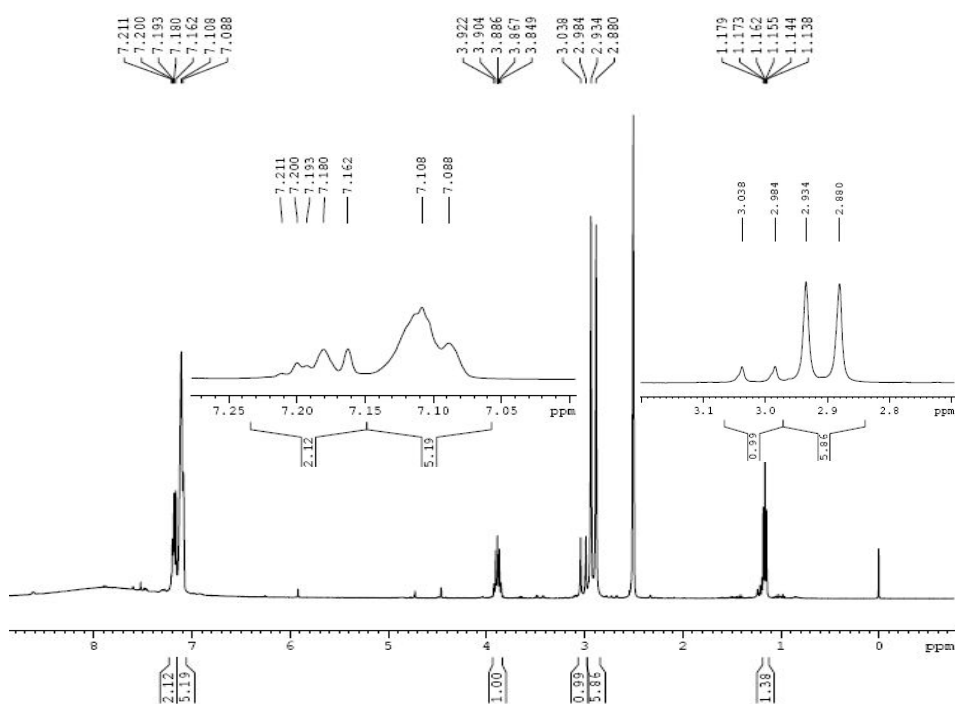

**Fig. S2** The  $^1\text{H}$  NMR of ligand  $\text{H}_4\text{L}$  in  $\text{DMSO}$ .

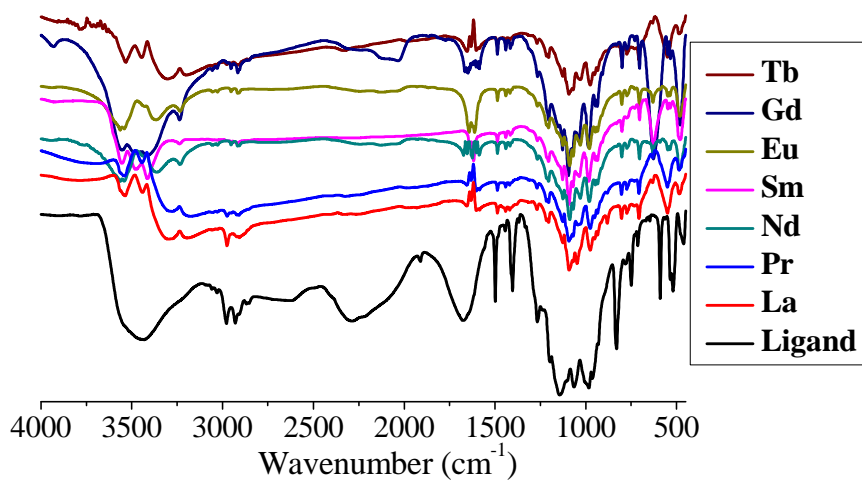

**Fig. S3** The FT-IR spectra of ligand  $\text{H}_4\text{L}$  and complexes **1–7**.

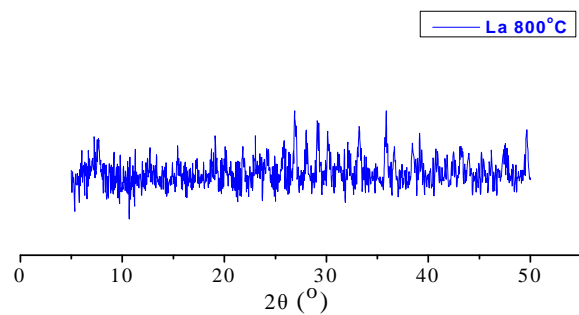

**Fig. S4** Powder XRD patterns of decomposed complex La.

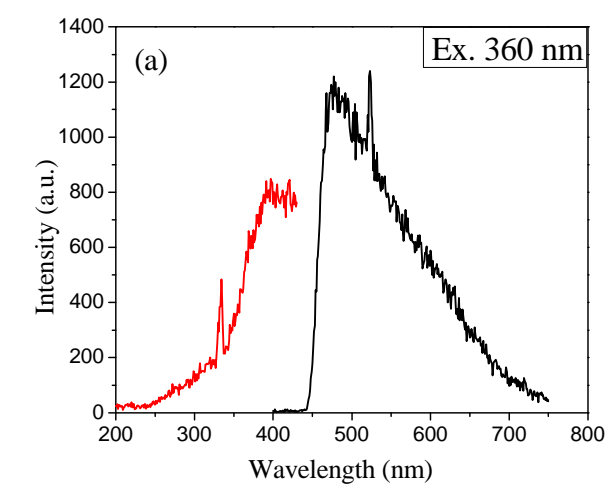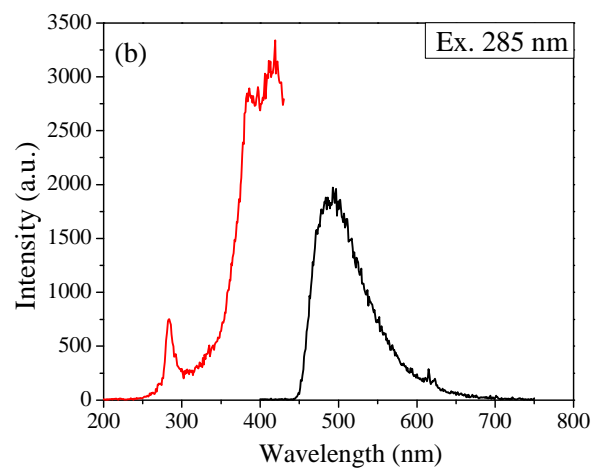

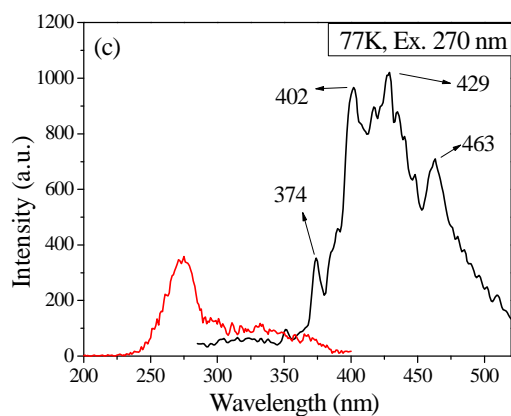

**Fig. S5** Solid-state excitation (red) and emission (black) spectra of ligand (a) and **6** (b) at r.t. and phosphorescence spectra of **6** (c) at 77K.

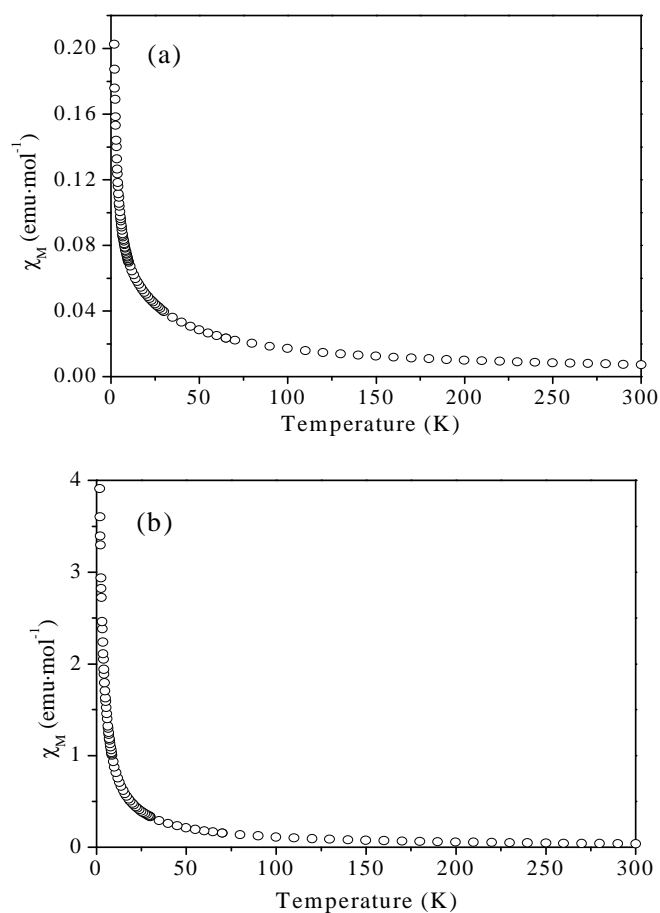

**Fig. S6** Plots of the temperature dependence of  $\chi_M$  for complexes **2** (a) and **7** (b).

**Table S1:** Selected Bond Lengths (Å) and Angles (°) for Complex **2**.

| Complex <b>2</b>                                                                        |            |                     |            |
|-----------------------------------------------------------------------------------------|------------|---------------------|------------|
| Bond Lengths (Å)                                                                        |            |                     |            |
| Pr(1)–O(1)                                                                              | 2.360(3)   | Pr(1)–O(4)          | 2.365(3)   |
| Pr(1)–O(7)                                                                              | 2.502(3)   | Pr(1)–O(8)          | 2.531(3)   |
| Pr(1)–O(3)#1                                                                            | 2.465(3)   | Pr(1)–O(5)#2        | 2.410(3)   |
| Pr(1)–O(6)#3                                                                            | 2.402(3)   |                     |            |
| Pr(1)–Pr(1)#1                                                                           | 4.8091(8)  | Pr(1)–Pr(1)#3       | 4.9090(8)  |
| Bond Angles (°)                                                                         |            |                     |            |
| O(1)–Pr(1)–O(4)                                                                         | 89.15(10)  | O(1)–Pr(1)–O(6)#3   | 153.97(9)  |
| O(4)–Pr(1)–O(6)#3                                                                       | 115.97(10) | O(1)–Pr(1)–O(5)#2   | 81.76(10)  |
| O(4)–Pr(1)–O(5)#2                                                                       | 138.59(10) | O(6)#3–Pr(1)–O(5)#2 | 74.82(9)   |
| O(1)–Pr(1)–O(3)#1                                                                       | 116.75(11) | O(4)–Pr(1)–O(3)#1   | 78.66(10)  |
| O(6)#3–Pr(1)–O(3)#1                                                                     | 77.18(9)   | O(5)#3–Pr(1)–O(3)#1 | 140.95(10) |
| O(1)–Pr(1)–O(7)                                                                         | 101.94(11) | O(4)–Pr(1)–O(7)     | 70.22(10)  |
| O(6)#3–Pr(1)–O(7)                                                                       | 81.82(10)  | O(5)#2–Pr(1)–O(7)   | 72.36(9)   |
| O(3)#1–Pr(1)–O(7)                                                                       | 129.39(9)  | O(1)–Pr(1)–O(8)     | 77.92(10)  |
| O(4)–Pr(1)–O(8)                                                                         | 141.54(10) | O(6) #3–Pr(1)–O(8)  | 85.33(10)  |
| O(5) #2–Pr(1)–O(8)                                                                      | 75.68(9)   | O(3) #1–Pr(1)–O(8)  | 75.43(9)   |
| O(7) –Pr(1)–O(8)                                                                        | 147.66(9)  |                     |            |
| Symmetry Code: #1 1 – x, 1 – y, 1 – z; #2 x, 1.5 – y, –0.5 + z; #3 1 – x, 2 – y, 1 – z. |            |                     |            |

**Table S2:** Experimental results under different pH values.

| Comple<br>x | pH and Experiment results <sup>a</sup> |      |      |      |      |      |       |      |
|-------------|----------------------------------------|------|------|------|------|------|-------|------|
|             |                                        |      |      |      |      |      |       |      |
| 1           | 2.52                                   | 2.57 | 2.60 | 2.66 | 2.69 | 2.73 | 2.76, | 2.80 |
|             | S                                      | S    | C    | C    | C    | C    | P     | P    |
| 2           | 2.49                                   | 2.52 | 2.55 | 2.58 | 2.61 | 2.66 | 2.68  | 2.73 |
|             | S                                      | C    | C    | C    | C    | C    | P     | P    |
| 3           | 2.46                                   | 2.48 | 2.49 | 2.53 | 2.55 | 2.58 | 2.61  | 2.65 |
|             | S                                      | S    | C    | C    | C    | C    | P     | P    |
| 4           | 2.39                                   | 2.41 | 2.43 | 2.46 | 2.49 | 2.53 | 2.55  | 2.58 |
|             | S                                      | C    | C    | C    | C    | C    | P     | P    |
| 5           | 2.33                                   | 2.36 | 2.38 | 2.43 | 2.46 | 2.48 | 2.51  | 2.55 |
|             | S                                      | S    | C    | C    | C    | P    | P     | P    |
| 6           | 2.30                                   | 2.33 | 2.35 | 2.39 | 2.43 | 2.46 | 2.49  | 2.53 |
|             | S                                      | S    | C    | C    | C    | C    | P     | P    |
| 7           | 2.25                                   | 2.28 | 2.30 | 2.34 | 2.36 | 2.39 | 2.43  | 2.49 |
|             | S                                      | S    | C    | C    | C    | C    | P     | P    |

<sup>a</sup> S = Solution; C = Crystal; P = Powder
